# Supplementary material for: Orientia tsutsugamushi Stimulates an Original Gene Expression Program in Monocytes: Relationship with Gene Expression in Patients with Scrub Typhus
Source: PubMed Central journal article supplement (PMC3096591; doi:10.1371/journal.pntd.0001028), 2011-05-17
Supplement: pntd.0001028.s001.pdf [file pntd.0001028.s001.pdf]

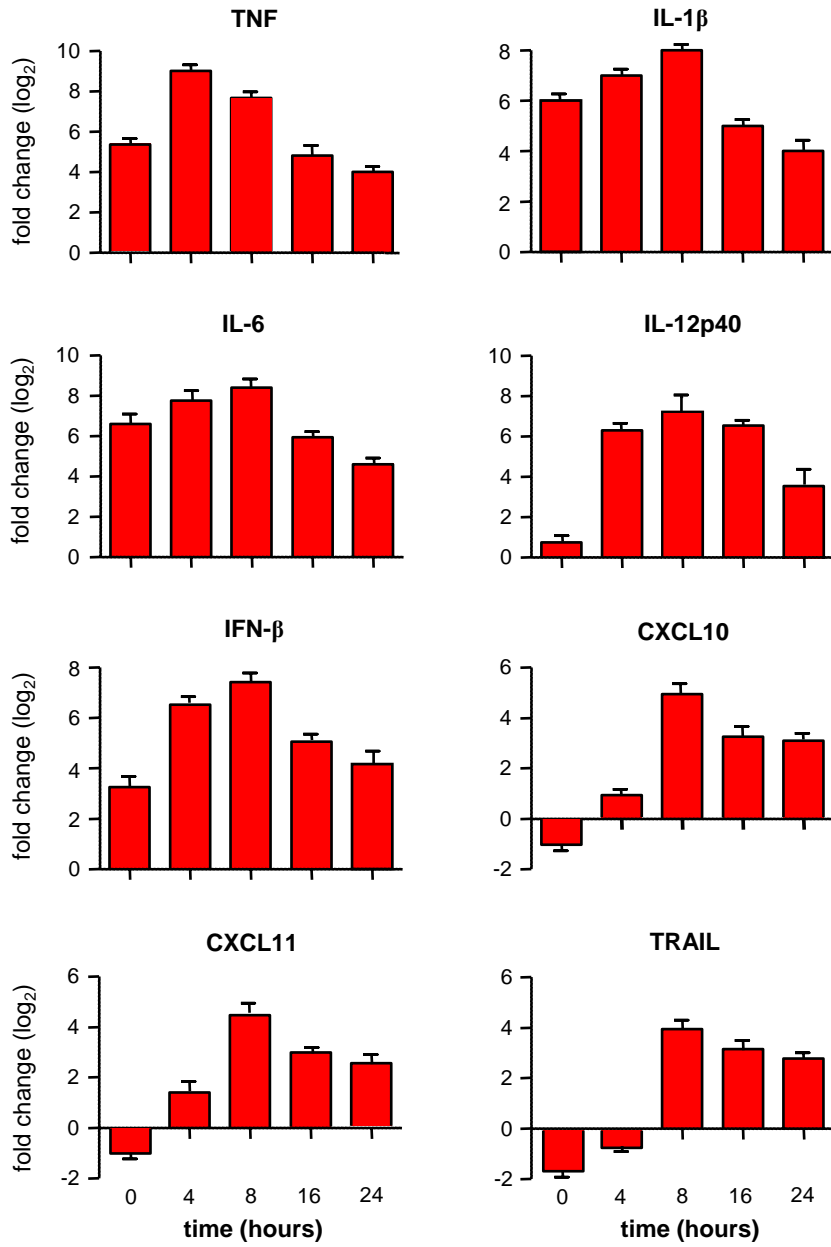

new Figure S1
