# Supplementary material for: Orientia tsutsugamushi Stimulates an Original Gene Expression Program in Monocytes: Relationship with Gene Expression in Patients with Scrub Typhus
Source: PubMed Central journal article supplement (PMC3096591; doi:10.1371/journal.pntd.0001028), 2011-05-17
Supplement: pntd.0001028.s004.pdf [file pntd.0001028.s004.pdf]

**Table S2.** Nucleotide sequences of oligonucleotide primers

| <b>Symbol</b>  | <b>Forward primers</b>         | <b>Reverse primers</b>           |
|----------------|--------------------------------|----------------------------------|
| TNF            | 5'- CCCGACTATCTCGACTTTGC-3'    | 5'-AGGTTGAGGGTGTCTGAAGGA-3'      |
| IL1 $\beta$    | 5'-GCTGAGGAAGATGCTGGTTC-3'     | 5'-TCCATATCCTGTCCCTGGAG-3'       |
| IL6            | 5'-TACCCCCAGGAGAAGATTCC-3'     | 5'-TTTTCTGCCAGTGCCTCTTT-3'       |
| IL12p35        | 5'-TCAGCAACATGCTCCAGAAGGC-3'   | 5'-TGCATTCATGGTCTTGAACTCCACC-3'  |
| IL12p40        | 5'-AGGGGACAACAAGGAGTATGAGT-3'  | 5'-AGGGAGAAGTAGGAATGTGGAGT-3'    |
| IL23p19        | 5'-AGGAGAAGAGGGAGATGAAGAGAC-3' | 5'-GCTATCAGGGAGCAGAGAAGG-3'      |
| IL15           | 5'-GTTAGCAGATAGCCAGCCATAC-3'   | 5'-TACTCAAAGCCACGGTAAATCC-3'     |
| CXCL10         | 5'-AAGCAGTTAGCAAGGAAAGGTC-3'   | 5'-TTGAAGCAGGGTCAGAACATC-3'      |
| CXCL11         | 5'-TATAGCCTTGGCTGTGATATTGTG-3' | 5'-CTGCCACTTTCACTGCTTTTACC-3'    |
| CCL20          | 5'-GACATCAATGCTATCATCTTTCAC-3' | 5'-GCTATGTCCAATTCCATTCCA-3'      |
| IFN $\beta$    | 5'-GACGCCGCATTGACCATCTA-3'     | 5'-CCTTAGGATTTCCACTCTGACT-3'     |
| IFN $\alpha$ 8 | 5'-ATGACCTGGAGTCCTGTGTGAT-3'   | 5'-GATCTCATGATTTCTGCTCTGACAAC-3' |
| OAS1           | 5'-TCCGCTAGTCAAGCACTGGTA-3'    | 5'-CCTGGGCTGTGTTGAAATGTGT-3'     |
| MX1            | 5'-GCCACCACAGAGGCTCTCAG-3'     | 5'-CTCAGCTGGTCCTGGATCTCCT-3'     |
| INDO           | 5'-TGCTGGTGGAGGACATGCTG-3'     | 5'-TGAAAGGACAAACTCACGGACTGA-3'   |
| TLR5           | 5'-CTTGTCCCAGTACCAGTTGATGA-3'  | 5'-AGGAGATGGTTGCTACAGTTTG-3'     |
| CBLB           | 5'-CCCTTTGTTGATCTAGCAAGTG-3'   | 5'-GTGCCTGTGAACCATCTGAA-3'       |
| LOC642161      | 5'-CTCAAATGCCCTCCTT TC-3'      | 5'-GGTTCTGTGAGTCCTGCTT-3'        |
| CD8A           | 5'-CCTTTACTGCAACCACAGGA-3'     | 5'-AGGAAGGATCTCAGTTTGAAG-3'      |
| CD8B1          | 5'-ACTTCTGCATGATCGTCG G-3'     | 5'-AGGGTGGACTTCTTGGTG-3'         |
| FOSB           | 5'-CAGCAGCTAAATGCAGGA-3'       | 5'-TTGGAGCTCGGCGATCT-3'          |
