# Supplementary material for: Orientia tsutsugamushi Stimulates an Original Gene Expression Program in Monocytes: Relationship with Gene Expression in Patients with Scrub Typhus
Source: PubMed Central journal article supplement (PMC3096591; doi:10.1371/journal.pntd.0001028), 2011-05-17
Supplement: pntd.0001028.s005.pdf [file pntd.0001028.s005.pdf]

**Table S3.** Modulated genes in the “immune response” GO term

| <b>Gene function and full gene name</b>                                               | <b>Gene symbol</b> | <b>GenBank ID</b> | <b>FC</b>       |
|---------------------------------------------------------------------------------------|--------------------|-------------------|-----------------|
| adenosine deaminase                                                                   | ADA                | NM_000022         | 3.8             |
| absent in melanoma 2                                                                  | AIM2               | NM_004833         | 8.1             |
| aquaporin 9                                                                           | AQP9               | AQP9              | 3.6             |
| <b>chemokine (C-C motif) ligand 1</b>                                                 | <b>CCL1</b>        | <b>NM_002981</b>  | <b>20.3</b>     |
| <b>chemokine (C-C motif) ligand 3</b>                                                 | <b>CCL3</b>        | <b>NM_002983</b>  | <b>9.0</b>      |
| <b>chemokine (C-C motif) ligand 4</b>                                                 | <b>CCL4</b>        | <b>NM_002984</b>  | <b>16.9</b>     |
| <b>chemokine (C-C motif) ligand 7</b>                                                 | <b>CCL7</b>        | <b>NM_006273</b>  | <b>23.2</b>     |
| <b>chemokine (C-C motif) ligand 8</b>                                                 | <b>CCL8</b>        | <b>NM_005623</b>  | <b>74.9</b>     |
| <b>chemokine (C-C motif) ligand 20</b>                                                | <b>CCL20</b>       | <b>NM_004591</b>  | <b>13.6</b>     |
| CD274 molecule                                                                        | CD274              | NM_014143         | 16.6            |
| CD40 molecule, TNF receptor superfamily member 5                                      | CD40               | NM_001250         | 6.0             |
| CD70 molecule                                                                         | CD70               | NM_001252         | 3.8             |
| CD80 molecule                                                                         | CD80               | NM_005191         | 21.3            |
| C-type lectin domain family 4, member D                                               | CLEC4D             | NM_080387         | 5.6             |
| C-type lectin domain family 4, member E                                               | CLEC4E             | NM_014358         | 7.5             |
| colony stimulating factor 2 (granulocyte-macrophage)                                  | CSF2               | NM_000758         | 7.8             |
| colony stimulating factor 3 (granulocyte)                                             | CSF3               | NM_000759         | 97.5            |
| <b>chemokine (C-X-C motif) ligand 1 (melanoma growth stimulating activity, alpha)</b> | <b>CXCL1</b>       | <b>NM_001511</b>  | <b>4.8</b>      |
| <b>chemokine (C-X-C motif) ligand 2</b>                                               | <b>CXCL2</b>       | <b>NM_002089</b>  | <b>2.8</b>      |
| <b>chemokine (C-X-C motif) ligand 3</b>                                               | <b>CXCL3</b>       | <b>NM_002090</b>  | <b>5.6</b>      |
| <b>chemokine (C-X-C motif) ligand 5</b>                                               | <b>CXCL5</b>       | <b>NM_002994</b>  | <b>2.7</b>      |
| <b>chemokine (C-X-C motif) ligand 10</b>                                              | <b>CXCL10</b>      | <b>NM_001565</b>  | <b>16.3</b>     |
| <b>chemokine (C-X-C motif) ligand 11</b>                                              | <b>CXCL11</b>      | <b>NM_005409</b>  | <b>98.2</b>     |
| <b>chemokine (C-X-C motif) ligand 13 (B-cell chemoattractant)</b>                     | <b>CXCL13</b>      | <b>NM_006419</b>  | <b>2.3</b>      |
| <b>chemokine (C-X-C motif) ligand 14</b>                                              | <b>CXCL14</b>      | <b>NM_004887</b>  | <b>4.1</b>      |
| eukaryotic translation initiation factor 2-alpha kinase 2                             | EIF2AK2            | NM_002759         | 13.0            |
| Fas (TNF receptor superfamily, member 6)                                              | FAS                | NM_000043         | 3.3             |
| guanylate binding protein 1, interferon-inducible, 67kDa                              | GBP1               | NM_002053         | 5.9             |
| guanylate binding protein 3                                                           | GBP3               | NM_018284         | 5.2             |
| guanylate binding protein 5                                                           | GBP5               | NM_052942         | 4.5             |
| guanylate binding protein 7                                                           | GBP7               | NM_207398         | 15.4            |
| GTP binding protein overexpressed in skeletal muscle                                  | GEM                | NM_005261         | 3.0             |
| GTP binding protein 1                                                                 | GTPBP1             | NM_004286         | 3.8             |
| interferon, alpha-inducible protein 27                                                | IFI27              | NM_005532         | 24.1            |
| interferon-induced protein 35                                                         | IFI35              | NM_005533         | 7.6             |
| interferon, alpha-inducible protein 6                                                 | IFI6               | NM_022873         | 10.2            |
| interferon-induced protein with tetratricopeptide repeats 1                           | IFIT1              | NM_001548         | 100.0           |
| interferon-induced protein with tetratricopeptide repeats 2                           | IFIT2              | NM_001547         | 49.2            |
| interferon-induced protein with tetratricopeptide repeats 3                           | IFIT3              | NM_001549         | 31.3            |
| interferon-induced protein with tetratricopeptide repeats 5                           | IFIT5              | NM_012420         | 9.7             |
| interferon induced transmembrane protein 1 (9-27)                                     | IFITM1             | NM_003641         | 14.7            |
| interferon induced transmembrane protein 2 (1-8D)                                     | IFITM2             | NM_006435         | 8.8             |
| interferon induced transmembrane protein 3 (1-8U)                                     | IFITM3             | NM_021034         | 10.6            |
| <b>interleukin 12B (p40)</b>                                                          | <b>IL 12B</b>      | <b>NM_002187</b>  | <b>&gt; 100</b> |
| <b>interleukin 15</b>                                                                 | <b>IL15</b>        | <b>NM_172174</b>  | <b>3.6</b>      |
| <b>interleukin 18 (interferon-gamma-inducing factor)</b>                              | <b>IL18</b>        | <b>NM_001562</b>  | <b>3.7</b>      |
| <b>interleukin 19</b>                                                                 | <b>IL19</b>        | <b>NM_153758</b>  | <b>35.9</b>     |

|                                                                                        |              |                  |                 |
|----------------------------------------------------------------------------------------|--------------|------------------|-----------------|
| <b>interleukin 1, alpha</b>                                                            | <b>IL1A</b>  | <b>NM_000575</b> | <b>9.0</b>      |
| <b>interleukin 1, beta</b>                                                             | <b>IL1B</b>  | <b>NM_000576</b> | <b>20.7</b>     |
| <b>interleukin 1 family, member 5 (delta)</b>                                          | <b>IL1F5</b> | <b>NM_012275</b> | <b>28.3</b>     |
| <b>interleukin 1 family, member 9</b>                                                  | <b>IL1F9</b> | <b>NM_019618</b> | <b>100.0</b>    |
| <b>interleukin 1 receptor antagonist</b>                                               | <b>IL1RN</b> | <b>BC068441</b>  | <b>17.8</b>     |
| <b>interleukin 1 receptor antagonist</b>                                               | <b>IL1RN</b> | <b>NM_173842</b> | <b>37.9</b>     |
| <b>interleukin 7 receptor</b>                                                          | <b>IL7R</b>  | <b>NM_002185</b> | <b>4.5</b>      |
| <b>interleukin 6</b>                                                                   | <b>IL6</b>   | <b>NM_000600</b> | <b>&gt; 100</b> |
| <b>interleukin 8</b>                                                                   | <b>IL8</b>   | <b>NM_000584</b> | <b>2.7</b>      |
| <b>interleukin 23, alpha subunit p19</b>                                               | <b>IL23A</b> | <b>NM_016584</b> | <b>5.1</b>      |
| indoleamine-pyrrole 2,3 dioxygenase                                                    | INDO         | NM_002164        | 15.6            |
| interferon regulatory factor 2                                                         | IRF2         | NM_002199        | 2.6             |
| interferon regulatory factor 7                                                         | IRF7         | NM_004031        | 14.9            |
| ISG15 ubiquitin-like modifier                                                          | ISG15        | NM_005101        | 54.1            |
| MHC class I polypeptide-related sequence B                                             | MICB         | NM_005931        | 2.9             |
| myxovirus (influenza virus) resistance 1, interferon-inducible protein p78 (mouse)     | MX1          | NM_002462        | 26.7            |
| myxovirus (influenza virus) resistance 2 (mouse)                                       | MX2          | NM_002463        | 50.2            |
| 2',5'-oligoadenylate synthetase 1, 40/46kDa                                            | OAS1         | NM_002534        | 13.6            |
| 2'-5'-oligoadenylate synthetase 2, 69/71kDa                                            | OAS2         | NM_016817        | 26.2            |
| 2'-5'-oligoadenylate synthetase 3, 100kDa                                              | OAS3         | NM_006187        | 21.7            |
| 2'-5'-oligoadenylate synthetase-like                                                   | OASL         | NM_003733        | 36.3            |
| oncostatin M                                                                           | OSM          | NM_020530        | 4.2             |
| regulator of G-protein signaling 1                                                     | RGS1         | NM_002922        | 4.7             |
| sema domain, immunoglobulin domain (Ig), short basic domain, secreted, (semaphorin) 3C | SEMA3C       | NM_006379        | 2.7             |
| transporter 1, ATP-binding cassette, sub-family B (MDR/TAP)                            | TAP1         | NM_000593        | 2.9             |
| tumor necrosis factor receptor superfamily, member 4                                   | TNFRSF4      | NM_003327        | 4.8             |
| tumor necrosis factor receptor superfamily, member 9                                   | TNFRSF9      | NM_001561        | 5.8             |
| tumor necrosis factor (ligand) superfamily, member 10                                  | TNFSF10      | NM_003810        | 78.7            |
| tumor necrosis factor (ligand) superfamily, member 15                                  | TNFSF15      | NM_005118        | 10.4            |
| tumor necrosis factor (ligand) superfamily, member 9                                   | TNFSF9       | NM_003811        | 8.1             |
| tripartite motif-containing 22                                                         | TRIM22       | NM_006074        | 8.4             |
| chemokine (C-C motif) receptor 2                                                       | CCR2         | NM_000647        | -2.5            |
| chemokine (C-C motif) receptor 2                                                       | CCR2         | NM_000648        | -2.8            |
| CD14 molecule                                                                          | CD14         | NM_000591        | -2.9            |
| CD22 molecule                                                                          | CD22         | NM_001771        | -3.7            |
| class II, major histocompatibility complex, transactivator                             | CIITA        | U18259           | -3.6            |
| C-type lectin domain family 10, member A                                               | CLEC10A      | NM_182906        | -4.4            |
| C-type lectin domain family 4, member A                                                | CLEC4A       | NM_016184        | -3.6            |
| cytotoxic and regulatory T cell molecule                                               | CRTAM        | NM_019604        | -2.7            |
| hepcidin antimicrobial peptide                                                         | HAMP         | NM_021175        | -4.7            |
| major histocompatibility complex, class II, DM beta                                    | HLA-DMB      | BC035650         | -10.2           |
| interleukin 16 (lymphocyte chemoattractant factor)                                     | IL16         | NM_172217        | -5.4            |
| interleukin 16 (lymphocyte chemoattractant factor)                                     | IL16         | NM_004513        | -3.3            |
| Notch homolog 1, translocation-associated (Drosophila)                                 | NOTCH1       | NM_017617        | -4.0            |
| ring finger protein 125                                                                | RNF125       | NM_017831        | -5.4            |
| signaling threshold regulating transmembrane adaptor 1                                 | SIT1         | NM_014450        | -4.1            |
| transcription factor 7 (T-cell specific, HMG-box)                                      | TCF7         | NM_003202        | -2.5            |
| tumor necrosis factor (ligand) superfamily, member 11                                  | TNFSF11      | NM_003701        | -2.1            |

The genes encoding chemokines and cytokines were presented in bold.
