# Supplementary material for: Orientia tsutsugamushi Stimulates an Original Gene Expression Program in Monocytes: Relationship with Gene Expression in Patients with Scrub Typhus
Source: PubMed Central journal article supplement (PMC3096591; doi:10.1371/journal.pntd.0001028), 2011-05-17
Supplement: pntd.0001028.s007.pdf [file pntd.0001028.s007.pdf]

**Table S5.** Apoptosis-related genes in *O. tsutsugamushi*-stimulated monocytes

| <b>Gene function and full gene name</b>                                                                                                 | <b>Gene symbol</b> | <b>GenBank ID</b> | <b>FC</b> |
|-----------------------------------------------------------------------------------------------------------------------------------------|--------------------|-------------------|-----------|
| <b>Apoptosis</b>                                                                                                                        |                    |                   |           |
| adenosine A2a receptor                                                                                                                  | ADORA2A            | NM_000675         | 13.4      |
| apoptosis-inducing factor, mitochondrion-associated, 2                                                                                  | AIFM2              | NM_032797         | 2.4       |
| AXIN1 up-regulated 1                                                                                                                    | AXUD1              | NM_033027         | 12,2      |
| B-cell receptor-associated protein 29                                                                                                   | BCAP29             | NM_001008407      | 2.5       |
| baculoviral IAP repeat-containing 4                                                                                                     | BIRC4              | NM_001167         | 2.3       |
| CD40 molecule, TNF receptor superfamily member 5                                                                                        | CD40               | NM_001250         | 6.0       |
| catenin, beta like 1                                                                                                                    | CTNNBL1            | NM_030877         | 2.4       |
| damage-regulated autophagy modulator                                                                                                    | DRAM               | BC018435          | 5.2       |
| eukaryotic translation initiation factor 2-alpha kinase 2                                                                               | EIF2AK2            | NM_002759         | 13.0      |
| Fas (TNF receptor superfamily, member 6)                                                                                                | FAS                | NM_000043         | 3.3       |
| immediate early response 3                                                                                                              | IER3               | NM_003897         | 5.3       |
| interleukin 19                                                                                                                          | IL19               | NM_153758         | 35.9      |
| interleukin 1, alpha                                                                                                                    | IL1A               | NM_000575         | 9.0       |
| interleukin 1, beta                                                                                                                     | IL1B               | NM_000576         | 20.7      |
| Janus kinase 2 (a protein tyrosine kinase)                                                                                              | JAK2               | NM_004972         | 4.9       |
| lipopolysaccharide-induced TNF factor                                                                                                   | LITAF              | NM_004862         | 2.2       |
| nuclear factor of kappa light polypeptide gene enhancer in B-cells 1 (p105)                                                             | NFKB1              | NM_003998         | 3.1       |
| oncostatin M                                                                                                                            | OSM                | NM_020530         | 4.2       |
| pleckstrin homology-like domain, family A, member 2                                                                                     | PHLDA2             | NM_003311         | 4.9       |
| protein phosphatase 1, regulatory (inhibitor) subunit 15A                                                                               | PPP1R15A           | NM_014330         | 3.1       |
| receptor (TNFRSF)-interacting serine-threonine kinase 1                                                                                 | RIPK1              | NM_003804         | 3.2       |
| serine/threonine kinase 3 (STE20 homolog, yeast)                                                                                        | STK3               | NM_006281         | 2.5       |
| TIA1 cytotoxic granule-associated RNA binding protein                                                                                   | TIA1               | NM_022173         | 2.5       |
| TIA1 cytotoxic granule-associated RNA binding protein                                                                                   | TIA1               | NM_022037         | 2.6       |
| tumor necrosis factor (TNF superfamily, member 2)                                                                                       | TNF                | NM_000594         | 13.9      |
| tumor necrosis factor, alpha-induced protein 3                                                                                          | TNFAIP3            | NM_006290         | 4.6       |
| tumor necrosis factor receptor superfamily, member 10a                                                                                  | TNFRSF10A          | NM_003844         | 4.3       |
| tumor necrosis factor receptor superfamily, member 10d, decoy with truncated death domain                                               | TNFRSF10D          | NM_003840         | 2.9       |
| tumor necrosis factor receptor superfamily, member 18                                                                                   | TNFRSF18           | NM_148901         | 3.6       |
| tumor necrosis factor (ligand) superfamily, member 9                                                                                    | TNFSF9             | NM_003811         | 8.1       |
| tumor necrosis factor (ligand) superfamily, member 10                                                                                   | TNFSF10            | NM_003810         | 78.7      |
| tumor necrosis factor (ligand) superfamily, member 15                                                                                   | TNFSF15            | NM_005118         | 10.4      |
| ubiquitin-conjugating enzyme E2Z                                                                                                        | UBE2Z              | NM_023079         | 2.4       |
| <b>Anti-apoptosis</b>                                                                                                                   |                    |                   |           |
| annexin A1                                                                                                                              | ANXA1              | NM_000700         | 2.6       |
| baculoviral IAP repeat-containing 4                                                                                                     | BIRC4              | NM_001167         | 2.3       |
| CASP8 and FADD-like apoptosis regulator                                                                                                 | CFLAR              | NM_003879         | 3.2       |
| CASP8 and FADD-like apoptosis regulator                                                                                                 | CFLAR              | AF009616          | 5.8       |
| immediate early response 3                                                                                                              | IER3               | NM_003897         | 5.3       |
| interferon, alpha-inducible protein 6                                                                                                   | IFI6               | NM_022873         | 10.2      |
| interleukin 1, alpha                                                                                                                    | IL1A               | NM_000575         | 9.0       |
| nuclear factor of kappa light polypeptide gene enhancer in B-cells 1 (p105)                                                             | NFKB1              | NM_003998         | 3.1       |
| v-rel reticuloendotheliosis viral oncogene homolog A, nuclear factor of kappa light polypeptide gene enhancer in B-cells 3, p65 (avian) | RELA               | BC014095          | 3.1       |
| serpin peptidase inhibitor, clade B (ovalbumin), member 2                                                                               | SERPINB2           | NM_002575         | 13.9      |
| suppressor of cytokine signaling 3                                                                                                      | SOCS3              | NM_003955         | 11.7      |
| sphingosine kinase 1                                                                                                                    | SPHK1              | NM_021972         | 2.6       |
| tumor necrosis factor (TNF superfamily, member 2)                                                                                       | TNF                | NM_000594         | 13.9      |

|                                                                                           |           |           |      |
|-------------------------------------------------------------------------------------------|-----------|-----------|------|
| tumor necrosis factor, alpha-induced protein 3                                            | TNFAIP3   | NM_006290 | 4.6  |
| tumor necrosis factor receptor superfamily, member 10d, decoy with truncated death domain | TNFRSF10D | NM_003840 | 2.9  |
| tumor necrosis factor receptor superfamily, member 18                                     | TNFRSF18  | NM_148901 | 3.6  |
| <b>Induction of apoptosis</b>                                                             |           |           |      |
| apoptosis-inducing factor, mitochondrion-associated, 2                                    | AIFM2     | NM_032797 | 2.4  |
| BCL2-antagonist/killer 1                                                                  | BAK1      | NM_001188 | 2.3  |
| caspase 10, apoptosis-related cysteine peptidase                                          | CASP10    | NM_032977 | 5.7  |
| caspase 10, apoptosis-related cysteine peptidase                                          | CASP10    | NM_032974 | 3.3  |
| CD70 molecule                                                                             | CD70      | NM_001252 | 3.8  |
| Fas (TNF receptor superfamily, member 6)                                                  | FAS       | NM_000043 | 3.3  |
| interferon, beta 1, fibroblast                                                            | IFNB1     | NM_002176 | 71.7 |
| interleukin 19                                                                            | IL19      | NM_153758 | 35.9 |
| inhibin, beta A (activin A, activin AB alpha polypeptide)                                 | INHBA     | AK001903  | 51.5 |
| inhibin, beta A                                                                           | INHBA     | NM_002192 | 39.0 |
| myxovirus (influenza virus) resistance 1, interferon-inducible protein p78 (mouse)        | MX1       | NM_002462 | 26.7 |
| pleiomorphic adenoma gene-like 1                                                          | PLAGL1    | NM_006718 | 1.9  |
| phorbol-12-myristate-13-acetate-induced protein 1                                         | PMAIP1    | NM_021127 | 4.5  |
| promyelocytic leukemia                                                                    | PML       | NM_002675 | 7.3  |
| promyelocytic leukemia                                                                    | PML       | NM_033238 | 10.3 |
| promyelocytic leukemia                                                                    | PML       | NM_033244 | 9.5  |
| promyelocytic leukemia                                                                    | PML       | NM_033247 | 8.1  |
| TIA1 cytotoxic granule-associated RNA binding protein                                     | TIA1      | NM_022173 | 2.5  |
| TIA1 cytotoxic granule-associated RNA binding protein                                     | TIA1      | NM_022037 | 2.6  |
| toll-like receptor 2                                                                      | TLR2      | NM_003264 | 3.1  |
| tumor necrosis factor receptor superfamily, member 10a                                    | TNFRSF10A | NM_003844 | 4.3  |
| tumor necrosis factor receptor superfamily, member 9                                      | TNFRSF9   | NM_003811 | 5.8  |
| tumor necrosis factor (ligand) superfamily, member 10                                     | TNFSF10   | NM_003810 | 78.7 |
| <b>Regulation of apoptosis</b>                                                            |           |           |      |
| BCL2-antagonist/killer 1                                                                  | BAK1      | NM_001188 | 2.3  |
| BCL2-like 14 (apoptosis facilitator)                                                      | BCL2L14   | NM_030766 | 20.6 |
| B-cell translocation gene 1, anti-proliferative                                           | BTG1      | NM_001731 | 3.7  |
| caspase 10, apoptosis-related cysteine peptidase                                          | CASP10    | NM_032977 | 5.7  |
| caspase 10, apoptosis-related cysteine peptidase                                          | CASP10    | NM_032974 | 3.3  |
| CASP8 and FADD-like apoptosis regulator                                                   | CFLAR     | NM_003879 | 3.2  |
| CASP8 and FADD-like apoptosis regulator                                                   | CFLAR     | AF009616  | 5.8  |
| Fas (TNF receptor superfamily, member 6)                                                  | FAS       | NM_000043 | 3.3  |
| interferon induced with helicase C domain 1                                               | IFIH1     | NM_022168 | 18.0 |
| nucleotide-binding oligomerization domain containing 2                                    | NOD2      | NM_022162 | 2.0  |
| TNF receptor-associated factor 1                                                          | TRAF1     | NM_005658 | 6.7  |
