# Supplementary material for: Orientia tsutsugamushi Stimulates an Original Gene Expression Program in Monocytes: Relationship with Gene Expression in Patients with Scrub Typhus
Source: PubMed Central journal article supplement (PMC3096591; doi:10.1371/journal.pntd.0001028), 2011-05-17
Supplement: pntd.0001028.s008.pdf [file pntd.0001028.s008.pdf]

**Table S6. List of the 65 transcripts specific for scrub typhus**

| down-modulated genes in scrub typhus |                      |           |           |           |
|--------------------------------------|----------------------|-----------|-----------|-----------|
| BCL11A                               | CORO1B               | FOSB      | GAGE6     | LDLRAP1   |
| RAPGEF3                              | SLC22A18             | Hs.552434 | LOC653374 |           |
| up-regulated genes in scrub typhus   |                      |           |           |           |
| ADD3                                 | FAM107B              | RASA2     | UBE1L2    | Hs.562182 |
| ATP13A3                              | FBXO4                | RKHD2     | UGCGL1    | Hs.250648 |
| AYTL2                                | FLJ20160             | RORA      | UHMK1     | LOC285513 |
| C9orf77                              | MACF1                | SLC25A32  | ZBTB2     | LOC642161 |
| CBLB                                 | NUP54                | SRPK2     | ZMYND11   | LOC649801 |
| CD3G                                 | NXF5                 | SUMO2     | ZNF326    | LOC651633 |
| CD8A                                 | NXT2                 | SYNE2     | ZNF644    | LOC652282 |
| CD8B1                                | PLEKHF1              | SYTL2     | Hs.561954 | LOC653115 |
| DLD                                  | PPP2R5C <sup>a</sup> | TCEA1     | Hs.573541 | LOC653663 |
| DLG1                                 | PRKACB <sup>a</sup>  | TCERG1    | Hs.373705 | LOC653675 |
| DNTTIP2                              | PRPS1L1              | TOPBP1    | Hs.567392 |           |

Down-modulated and up-regulated genes in scrub typhus were compared to murine typhus, malaria and dengue, and were identified by Welch ANOVA ( $P < 0.05$ , FDR  $< 5\%$ ) followed by Tukey HSD post hoc test. <sup>a</sup>Two isoforms of gene transcripts are included in the list.
