# Supplementary material for: Orientia tsutsugamushi Stimulates an Original Gene Expression Program in Monocytes: Relationship with Gene Expression in Patients with Scrub Typhus
Source: PLoS Negl Trop Dis. 2011 May 17;5(5):e1028. doi: 10.1371/journal.pntd.0001028 (PMC3096591; doi:10.1371/journal.pntd.0001028)
Supplement: Table S4 — M1 and M2 genes in O. tsutsugamushi-stimulated monocytes. (PDF) [file pntd.0001028.s006.pdf]

**Table S4.** M1 and M2 genes in *O. tsutsugamushi*-stimulated monocytes

| Gene category and name                                    | Gene symbol  | Fold change     |
|-----------------------------------------------------------|--------------|-----------------|
| <b>M1 genes</b>                                           |              |                 |
| Chemokine (C-C motif) receptor 7                          | CCR7         | 2.6             |
| Interleukin 2 receptor $\alpha$ chain                     | IL2RA        | 1.9             |
| Interleukin 7 receptor                                    | IL7R         | 4.5             |
| Interleukin 15 receptor $\alpha$ chain                    | IL15RA       | 15.6            |
| Chemokine (C-C motif) ligand 2                            | CCL2         | nc              |
| Chemokine (C-C motif) ligand 3                            | CCL3         | 9.0             |
| Chemokine (C-C motif) ligand 4                            | CCL4         | 16.9            |
| Chemokine (C-C motif) ligand 5                            | CCL5         | 1.5             |
| Chemokine (C-C motif) ligand 15                           | CCL15        | nc              |
| Chemokine (C-C motif) ligand 19                           | CCL19        | nc              |
| Chemokine (C-C motif) ligand 20                           | CCL20        | 13.6            |
| Chemokine (C-X-C motif) ligand 8                          | CXCL8, IL8   | 2.7             |
| Chemokine (C-X-C motif) ligand 9                          | CXCL9        | nc              |
| Chemokine (C-X-C motif) ligand 10                         | CXCL10       | 16.3            |
| Chemokine (C-X-C motif) ligand 11                         | CXCL11       | 98.1            |
| Chemokine (C-X-C motif) ligand 16                         | CXCL16       | nc              |
| Endothelial cell growth factor 1 (platelet-derived)       | ECGF1        | 1.6             |
| Interleukin 1 $\alpha$                                    | IL1A         | 9.0             |
| <b>Interleukin 1<math>\beta</math></b>                    | <b>IL1B</b>  | <b>20.6</b>     |
| <b>Interleukin 6</b>                                      | <b>IL6</b>   | <b>&gt; 100</b> |
| <b>Interleukin 12A</b>                                    | <b>IL12A</b> | <b>3.0</b>      |
| <b>Interleukin 12B</b>                                    | <b>IL12B</b> | <b>&gt; 100</b> |
| <b>Interleukin 15</b>                                     | <b>IL15</b>  | <b>3.6</b>      |
| <b>Interleukin 23 <math>\alpha</math> subunit p19</b>     | <b>IL23A</b> | <b>5.1</b>      |
| <b>Tumor necrosis factor ligand superfamily, member 2</b> | <b>TNF</b>   | <b>13.9</b>     |
| Tumor necrosis factor ligand superfamily, member 10       | TRAIL        | 78.7            |
| Visfatin                                                  | PBEF1        | 7.0             |
| <b>Apoptosis-related genes</b>                            |              |                 |
| BCL2-related protein A1                                   | BCL2A1       | nc              |
| Fas (TNF receptor superfamily, member 6)                  | FAS          | 3.3             |
| Baculoviral IAP repeat-containing 3                       | BIRC3        | 1.5             |
| growth arrest and DNA-damage-inducible, gamma             | GADD45G      | 2.0             |
| XIAP associated factor-1                                  | XAF1         | 13.2            |
| <b>M2 genes</b>                                           |              |                 |
| CD36                                                      | CD36         | -2              |
| CD163                                                     | CD163        | -1.8            |
| CD209                                                     | DCSIGN       | nc              |
| Chemokine (C-X-C motif) receptor 4                        | CXCR4        | -3.8            |
| C-type lectin receptor DCL-1                              | DCL-1        | -1.5            |
| C-type lectin superfamily member 12                       | DECTIN1      | -1.9            |
| Fc $\epsilon$ -RII                                        | CD23         | -2.5            |
| G protein-coupled receptor 105                            | P2RY14       | -1.7            |
| G protein-coupled receptor 86                             | GPR86        | -5.1            |
| Histamine receptor H1                                     | HRH1         | 1.7             |
| macrophage scavenger receptor 1                           | MSR1         | 1.7             |
| Macrophage scavenger receptor 1                           | MSR1         | nc              |
| Mannose receptor C type 1                                 | MRC1         | -2.2            |
| Membrane-spanning 4-domains, subfamily A, member 4        | MS4A4A       | -1.7            |
| Membrane-spanning 4-domains, subfamily A, member 6A       | MS4A6A       | -3              |
| Purinergic receptor P2Y5                                  | P2RY5        | -1.6            |
| Transforming growth factor $\beta$ receptor II            | TGFB2        | -3.6            |

|                                                |        |      |
|------------------------------------------------|--------|------|
| Transforming growth factor $\beta$ receptor II | TGFBR2 | -3.9 |
| Chemokine (C-C motif) ligand 1                 | CCL1   | 20.3 |
| Chemokine (C-C motif) ligand 13                | CCL13  | 2.0  |
| Chemokine (C-C motif) ligand 17                | CCL17  | nc   |
| Chemokine (C-C motif) ligand 18                | CCL18  | nc   |
| Chemokine (C-C motif) ligand 22                | CCL22  | nc   |
| Chemokine (C-C motif) ligand 23                | CCL23  | 4.7  |
| Chemokine (C-C motif) ligand 24                | CCL24  | nc   |
| Interleukin 1 receptor antagonist              | IL1RN  | 37.9 |
| Interleukin 10                                 | IL10   | 1.6  |

M1 and M2 genes are referred to specific transcriptional profiles provided in references 28 and 29. The expression of the genes in bold letters was confirmed by qRT-PCR. nc : not changed. FC in microarray.
